# Supplementary material for: Citric acid-assisted synthesis of FeFe(CN)6 with reduced defects and high specific surface area for aqueous zinc–sodium hybrid batteries
Source: Royal Society of Chemistry journal article supplement (doi:10.1039/d4ma00303a), 2024-01-01
Supplement: d4ma00303a1.pdf [file d4ma00303a1.pdf]

## **Supplementary Information**

### **Citric acid-assisted synthesis of $\text{FeFe}(\text{CN})_6$ with reduced defects and high specific surface area for aqueous zinc-sodium hybrid batteries**

Chaoqiao Yang<sup>a</sup>, Ya Zhao<sup>a</sup>, Jiaxin Fan<sup>b,\*</sup>, Lin Li<sup>b</sup>, Jinxia Zhou<sup>a</sup>, Keliang Wang<sup>b</sup>,  
Fenglian Lu<sup>b</sup>, Hongmei Sun<sup>b</sup>

<sup>a</sup>College of Environmental and Chemical Engineering, Dalian University, Dalian,  
116622, Liaoning, China

<sup>b</sup>School of Chemistry and Materials Engineering, Liupanshui Normal University,  
Liupanshui, 553004, Guizhou, China

\*Corresponding author: [fmf\\_fjx@163.com](mailto:fmf_fjx@163.com).

## **Experimental**

### **1. Materials and reagents**

$\text{K}_3\text{Fe}(\text{CN})_6$  (99.5%) was purchased from Shanghai No.1 Reagent Factory.  $\text{FeCl}_3 \cdot 6\text{H}_2\text{O}$  (99%) was purchased from Macklin. Citric acid ( $\text{C}_6\text{H}_8\text{O}_7 \cdot \text{H}_2\text{O}$ , 99.5%) was purchased from National Group Chemical Reagent Co., LTD.  $\text{Na}_2\text{SO}_4$  (99%) and  $\text{ZnSO}_4 \cdot 7\text{H}_2\text{O}$  (99.5%) were purchased from Chengdu Jinshan Chemical Reagent Company. Zinc foil (99.99%, 0.02 mm) was purchased from Alfa Aesar.

### **2. Material synthesis**

$\text{C-FeFe}(\text{CN})_6$  was synthesized using a controlled crystallization method assisted by citric acid. Usually, 0.01 mol  $\text{FeCl}_3 \cdot 6\text{H}_2\text{O}$  and 0.01 mol  $\text{C}_6\text{H}_8\text{O}_7 \cdot \text{H}_2\text{O}$  are dissolved in 50 ml deionized water to form 0.2 mol  $\text{L}^{-1}$  citrate<sup>3-</sup>–Fe<sup>3+</sup> chelating solution. This solution (50 mL) and 0.2 mol  $\text{L}^{-1}$   $\text{K}_3\text{Fe}(\text{CN})_6$  solution (50 mL) were then added dropwise into 100 mL deionized water for co-precipitation. Thereafter the water bath was stirred at 60 °C for 6 hours. The precipitate was centrifuged, washed several times with deionized water, and finally dried at 80 °C for 12 h.

### **3. Material characterization**

The crystal structure of the synthesized material was analyzed by X-ray diffraction (XRD) using Shimadzu 7000S X-ray diffractometer. The scanning speed was 5 ° min<sup>-1</sup> from 10° to 80°. Fourier transform infrared spectroscopy (FTIR) was recorded in transmission mode on an infrared spectrometer (FTIR, Nicolet iS5 type). The water content of the sample was determined by a thermogravimetric analyzer (TG, Netzsch TG/209 F3 Tarsus). The test was carried out under nitrogen protection, the heating rate

was  $10\text{ }^{\circ}\text{C min}^{-1}$ , and the heating range was  $30\text{-}500\text{ }^{\circ}\text{C}$ . Raman spectroscopy was performed on the LabRAM HR Evolution Raman spectrometer using a laser with a wavelength of  $532\text{ nm}$ . The morphology and structure were characterized by scanning electron microscopy (SEM, TESCAN MIRA LMS) and transmission electron microscopy (TEM, libra 200). X-ray photoelectron spectroscopy (XPS) measurements were performed on a single Al  $K\alpha$  radiation (Thermo Scientific K-Alpha), and all binding energies were adjusted using the standard signal of carbon at  $284.80\text{ eV}$ . The K and Fe elements of the sample were measured by inductively coupled plasma emission spectrometry (ICP-OES, Agilent 5110, USA), and the sample was dissolved in hydrochloric acid. The C and N elements of the sample were measured by elemental analyzer (EA, Elementar UNICUBE, Germany).

#### **4. Electrochemical test**

The positive electrode was prepared by mixing the active material, acetylene black and polytetrafluoroethylene at a mass ratio of  $7\text{:}2\text{:}1$ . The uniformly mixed slurry was coated on the carbon foil current collector and dried at  $80\text{ }^{\circ}\text{C}$  for  $12\text{ h}$ . After drying, it was cut into  $14\text{ mm}$  small discs for subsequent use, and the mass loading of the active material was  $1.05\text{ mg cm}^{-2}$ . The cyclic voltammetry (CV) and electrochemical impedance spectroscopy (EIS) tests were performed at the VersaSTAT 3 electrochemical workstation. The CV tests were carried out using a three-electrode system, in which  $\text{C-FeFe(CN)}_6$  was used as the working electrode, and a zinc flake was employed as the counter and reference electrode. The test was performed in the range of  $0.5\text{-}1.8\text{ V}$ . The EIS test was carried out in the frequency range of  $100\text{ kHz}$  to  $0.01$

Hz with a potential amplitude of 5 mV. The coin-type cell (CR2025) was prepared by using  $\text{C-FeFe(CN)}_6$  as the positive electrode, Zn metal as the negative electrode and glass fiber membrane as the separator. For zinc-sodium hybrid cells, the as-used electrolyte is a mixed solution containing 0.1 M  $\text{ZnSO}_4$  and 1 M  $\text{Na}_2\text{SO}_4$ . The rate performance, cycling performance and galvanostatic current charge-discharge performance of the battery were tested in the voltage range of 0.1-1.8 V on the Land 3002A battery test system. In the galvanostatic charge-discharge (GCD) process, cells were initially discharged to 0.1 V, then were charged to 1.8 V, followed by the cycling process.

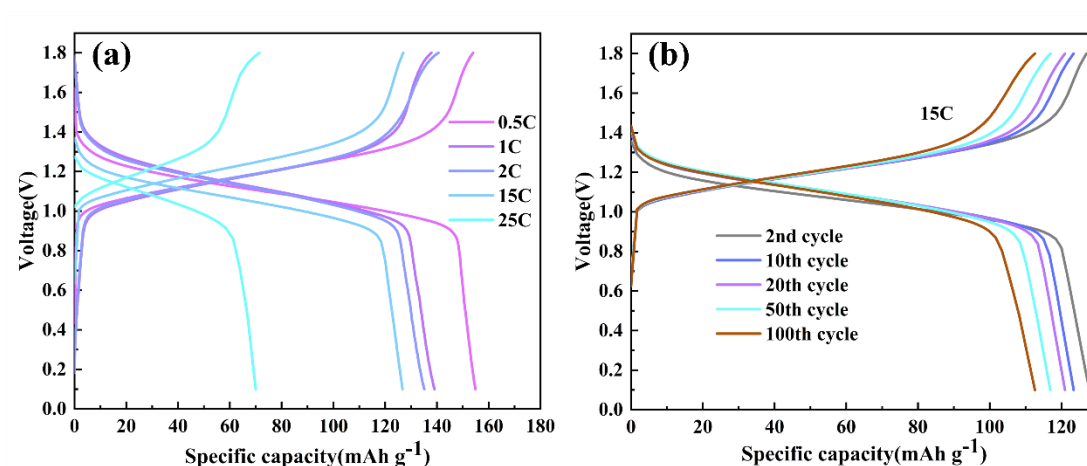

**Fig. S1** (a) Charge-discharge curves at different current densities from 0.5C, 1C, 2C, 15C to 25C; (b) GCD curves of different cycle times.

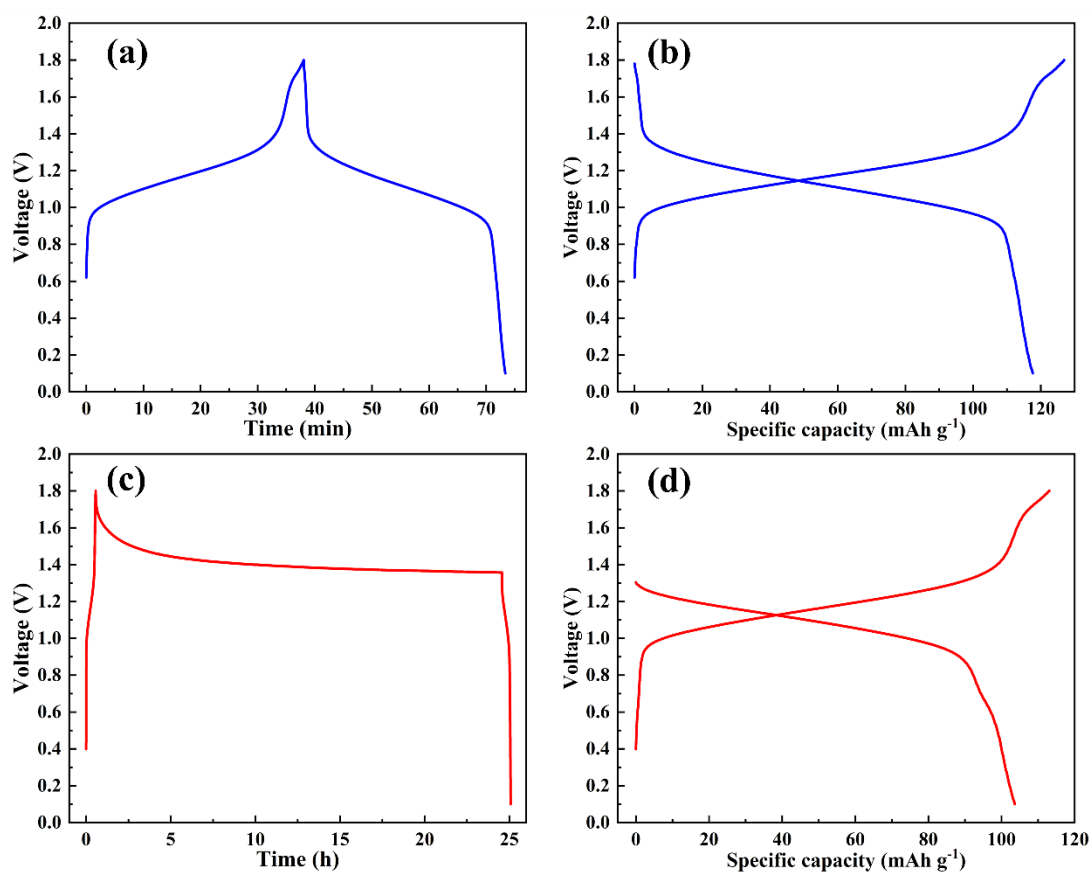

**Fig. S2** Self-discharge performance evaluations of the C-FeFe(CN)<sub>6</sub>. (a) Voltage-time and (b) voltage-specific capacity without resting; (c) voltage-time and (d) voltage-specific capacity for resting 24 h.

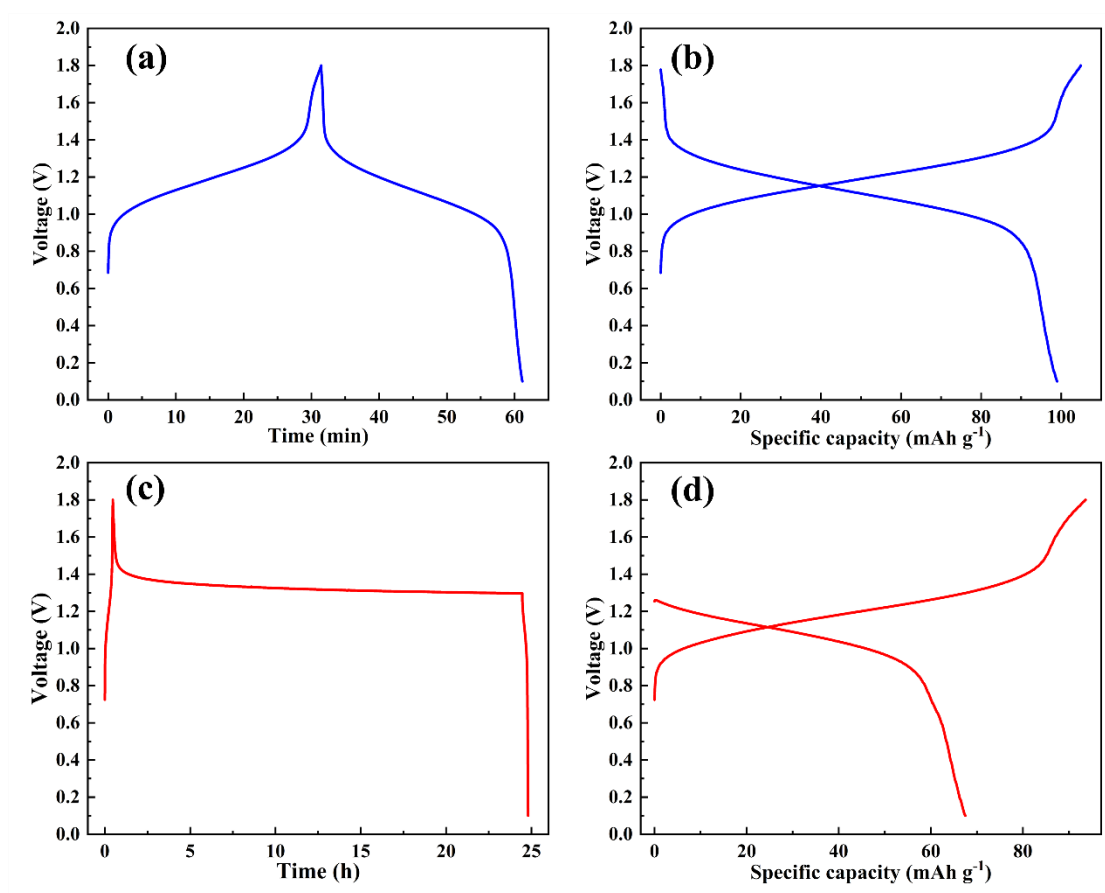

**Fig. S3** Self-discharge performance evaluations of the  $\text{FeFe(CN)}_6$  electrode. (a) Voltage-time and (b) voltage-specific capacity without resting; (c) voltage-time and (d) voltage-specific capacity resting for 24 h.

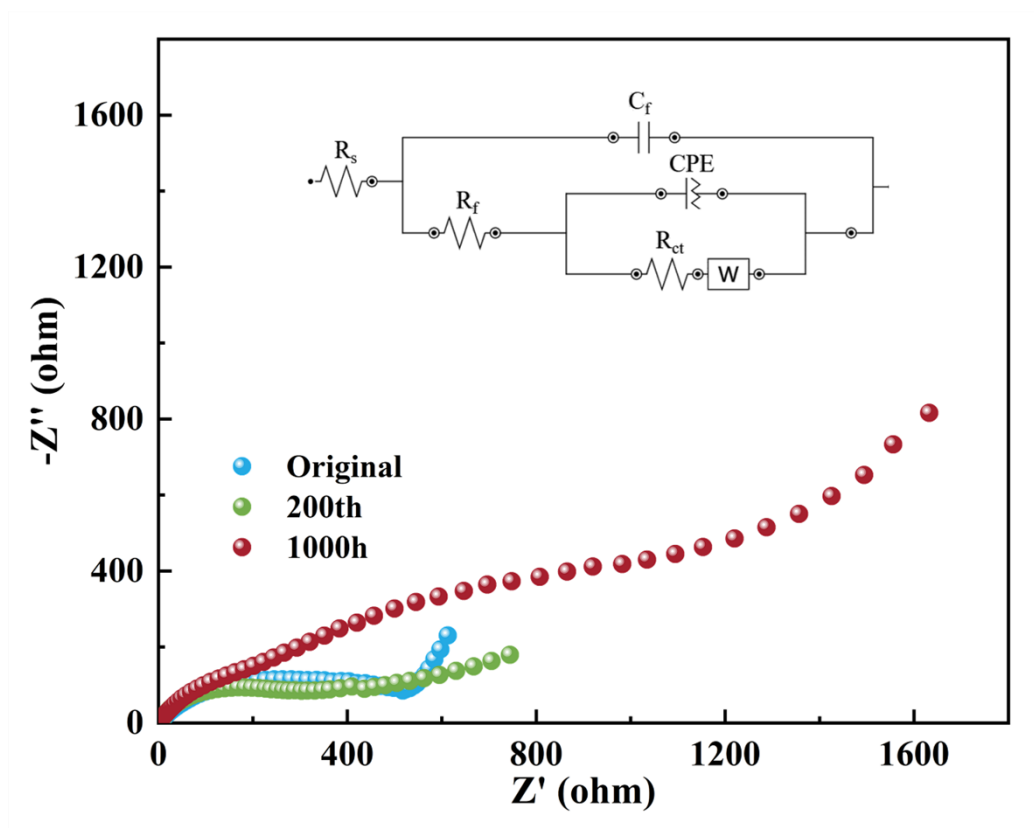

Fig. S4 EIS curves under different cycles of the  $\text{FeFe}(\text{CN})_6$ .

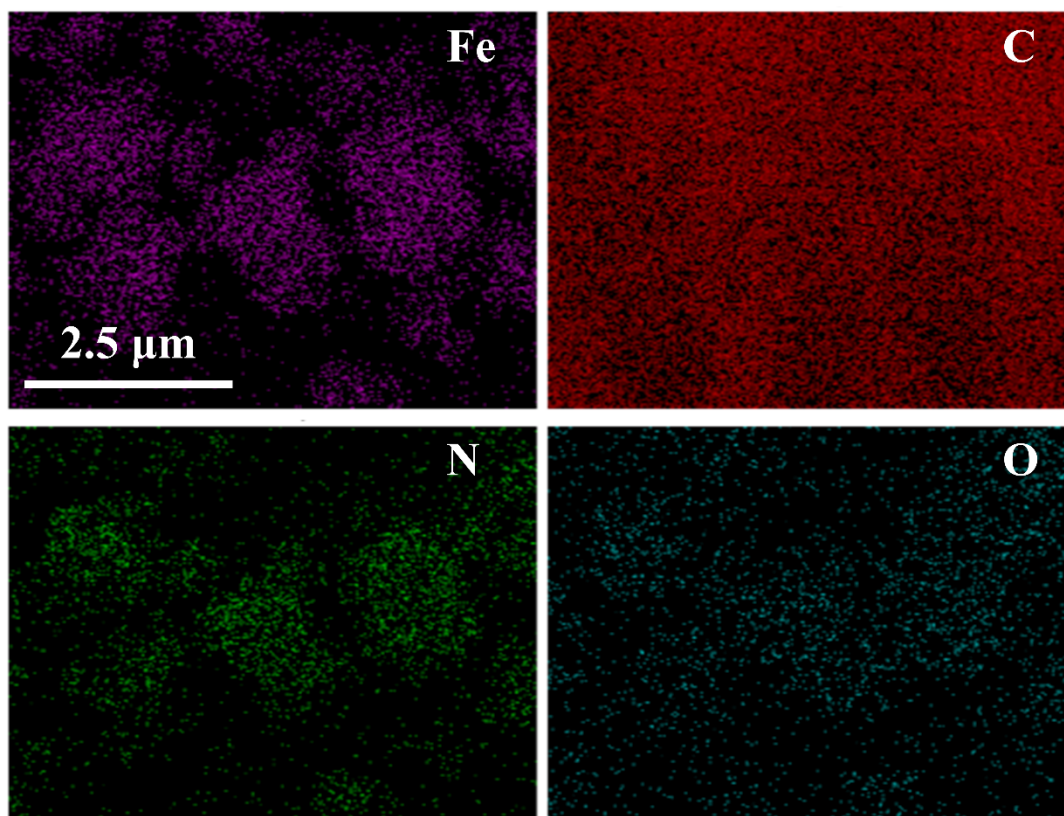

Fig. S5 EDS elemental mappings of the  $\text{FeFe}(\text{CN})_6$ .

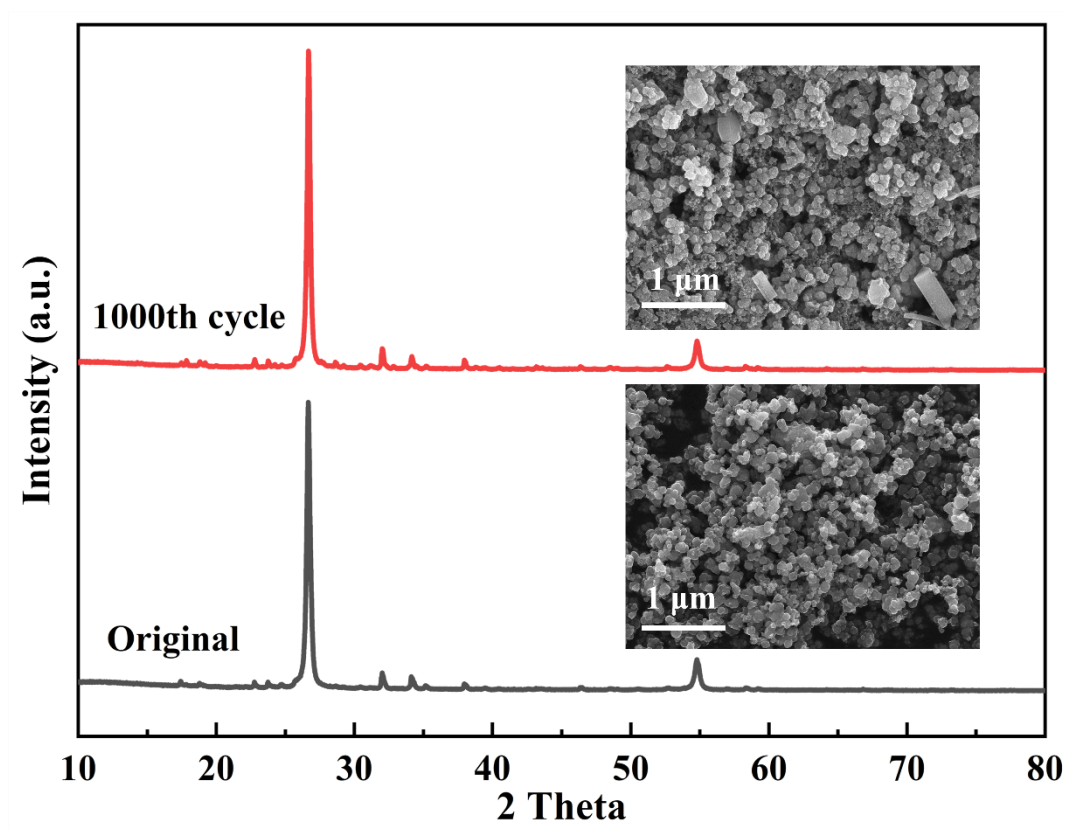

**Fig. S6** XRD patterns and SEM images of  $\text{FeFe}(\text{CN})_6$  electrode before and after cycling.

**Table S1** Comparison of BET data of  $\text{C-FeFe}(\text{CN})_6$  and  $\text{FeFe}(\text{CN})_6$ .

| Materials                    | $S_{\text{BET}}$<br>( $\text{m}^2 \text{g}^{-1}$ ) | Pore volume<br>( $\text{cm}^3 \text{g}^{-1}$ ) | Average pore size<br>(nm) | Maximum pore volume<br>( $\text{cm}^3 \text{g}^{-1}$ ) |
|------------------------------|----------------------------------------------------|------------------------------------------------|---------------------------|--------------------------------------------------------|
| $\text{C-FeFe}(\text{CN})_6$ | 406.625                                            | 0.251                                          | 2.472                     | 0.207                                                  |
| $\text{FeFe}(\text{CN})_6$   | 28.143                                             | 0.036                                          | 5.056                     | 0.012                                                  |

**Table S2** Elemental contents of  $\text{C-FeFe}(\text{CN})_6$  and  $\text{FeFe}(\text{CN})_6$  samples.

| Methods                      | ICP-OES |       | Elemental analysis |       | TG                   |
|------------------------------|---------|-------|--------------------|-------|----------------------|
| Materials                    | K       | Fe    | C                  | N     | $\text{H}_2\text{O}$ |
| $\text{C-FeFe}(\text{CN})_6$ | 2.60    | 37.08 | 20.65              | 24.78 | 14.89                |
| $\text{FeFe}(\text{CN})_6$   | 0       | 39.64 | 20.31              | 24.21 | 15.84                |



**Table S3** The measurement results of C-FeFe(CN)<sub>6</sub> EIS data.

| Components                | Original              | 200th                 | 1000th                |
|---------------------------|-----------------------|-----------------------|-----------------------|
| <b>R<sub>s</sub> (Ω)</b>  | 1.14                  | 1.07                  | 0.83                  |
| <b>C<sub>f</sub> (F)</b>  | 4.49*10 <sup>-4</sup> | 2.95*10 <sup>-5</sup> | 7.39*10 <sup>-6</sup> |
| <b>R<sub>f</sub> (Ω)</b>  | 7.53                  | 3.56                  | 7.71                  |
| <b>Q-Y<sub>0</sub></b>    | 4.35*10 <sup>-4</sup> | 1.53*10 <sup>-4</sup> | 3.49*10 <sup>-4</sup> |
| <b>Q-n</b>                | 0.58                  | 0.74                  | 0.57                  |
| <b>R<sub>ct</sub> (Ω)</b> | 804.5                 | 548.6                 | 244.0                 |
| <b>W</b>                  | 4.44*10 <sup>-3</sup> | 2.30*10 <sup>-3</sup> | 2.93*10 <sup>-3</sup> |

**Table S4** The fitting results of C-FeFe(CN)<sub>6</sub> EIS data according to the equivalent circuit of

[R(C[R(Q[RW])])], fitted by Zsimpwin software.

| Components                | Original              | 200th                 | 1000th                |
|---------------------------|-----------------------|-----------------------|-----------------------|
| <b>R<sub>s</sub> (Ω)</b>  | 1.14                  | 1.07                  | 0.83                  |
| <b>C<sub>f</sub> (F)</b>  | 4.49*10 <sup>-6</sup> | 2.95*10 <sup>-6</sup> | 7.39*10 <sup>-6</sup> |
| <b>R<sub>f</sub> (Ω)</b>  | 7.52                  | 3.56                  | 7.71                  |
| <b>Q-Y<sub>0</sub></b>    | 4.35*10 <sup>-4</sup> | 1.53*10 <sup>-4</sup> | 3.49*10 <sup>-4</sup> |
| <b>Q-n</b>                | 0.58                  | 0.74                  | 0.57                  |
| <b>R<sub>ct</sub> (Ω)</b> | 804.5                 | 548.7                 | 244.0                 |
| <b>W</b>                  | 4.44*10 <sup>-3</sup> | 2.30*10 <sup>-3</sup> | 2.93*10 <sup>-3</sup> |

**Table S5** The fitting results of FeFe(CN)<sub>6</sub> EIS data according to the equivalent circuit of

[R(C[R(Q[RW])])], fitted by Zsimpwin software.

| Components                | Original              | 200th                 | 1000th                |
|---------------------------|-----------------------|-----------------------|-----------------------|
| <b>R<sub>s</sub> (Ω)</b>  | 3.74                  | 0.66                  | 0.74                  |
| <b>C<sub>f</sub> (F)</b>  | 4.43*10 <sup>-6</sup> | 7.46*10 <sup>-6</sup> | 5.93*10 <sup>-6</sup> |
| <b>R<sub>f</sub> (Ω)</b>  | 4.93                  | 5.99                  | 6.98                  |
| <b>Q-Y<sub>0</sub></b>    | 3.70*10 <sup>-4</sup> | 3.17*10 <sup>-4</sup> | 1.97*10 <sup>-4</sup> |
| <b>Q-n</b>                | 0.53                  | 0.64                  | 0.60                  |
| <b>R<sub>ct</sub> (Ω)</b> | 500.7                 | 356.7                 | 1112                  |
| <b>W</b>                  | 1.65*10 <sup>-2</sup> | 9.70*10 <sup>-3</sup> | 1.03*10 <sup>-2</sup> |

**Table S6** Comparison of the electrochemical performances of the Zn//C-FeFe(CN)<sub>6</sub> with other reported aqueous batteries.

| Materials                                      | Electrolyte                                                  | Specific capacity at $x$ A g <sup>-1</sup> | Capacity retention at $y$ A g <sup>-1</sup> after $n$ cycles | Ref.      |
|------------------------------------------------|--------------------------------------------------------------|--------------------------------------------|--------------------------------------------------------------|-----------|
| Na//Na <sub>2</sub> CoFe(CN) <sub>6</sub>      | 1 M Na <sub>2</sub> SO <sub>4</sub>                          | 128 ( $x=0.13$ )                           | 90% ( $n=800$ , $y=2.6$ )                                    | 1         |
| Na//Na <sub>2</sub> CoFe(CN) <sub>6</sub>      | 1 M NaClO <sub>4</sub>                                       | 153 ( $x=0.01$ )                           | 90% ( $n=200$ , $y=0.1$ )                                    | 2         |
| Na//Na <sub>1.70</sub> FeFe(CN) <sub>6</sub>   | 1 M NaClO <sub>4</sub>                                       | 120.7 ( $x=0.2$ )                          | 75% ( $n=100$ , $y=0.2$ )                                    | 3         |
| Na//Na <sub>1.87</sub> NiMnFe(CN) <sub>6</sub> | 1 M NaPF <sub>6</sub>                                        | 120 ( $x=0.05$ )                           | 91% ( $n=400$ , $y=0.1$ )                                    | 4         |
| Zn//C-FeFe(CN) <sub>6</sub>                    | 0.1 M ZnSO <sub>4</sub> +1 M Na <sub>2</sub> SO <sub>4</sub> | 162.5 ( $x=0.02$ )                         | 88% ( $n=200$ , $y=9$ )                                      | This work |

**Table S7** Comparison of the electrochemical performances of the Zn//C-FeFe(CN)<sub>6</sub> with other reported Zinc-ion batteries.

| Materials               | Electrolyte                                                  | Specific capacity at $x$ A g <sup>-1</sup> | Capacity retention at $y$ A g <sup>-1</sup> after $n$ cycles | Ref.      |
|-------------------------|--------------------------------------------------------------|--------------------------------------------|--------------------------------------------------------------|-----------|
| FeFe(CN) <sub>6</sub>   | aqueous HCZLE electrolyte                                    | 60 ( $x=1$ )                               | 73% ( $n=10000$ , $y=3$ )                                    | <b>5</b>  |
| FeFe(CN) <sub>6</sub>   | 1.0 M Zn(OAc) <sub>2</sub> /([Ch]OAc+30 wt% water mixtures   | 120 ( $x=0.01$ )                           | 94% ( $n=10$ , $y=0.01$ )                                    | <b>6</b>  |
| FeFe(CN) <sub>6</sub>   | K/Zn (3:3) hybrid electrolyte                                | 169.2 ( $x=0.1$ )                          | 57% ( $n=1000$ , $y=1$ )                                     | <b>7</b>  |
| C-FeFe(CN) <sub>6</sub> | 0.1 M ZnSO <sub>4</sub> +1 M Na <sub>2</sub> SO <sub>4</sub> | 162.5 ( $x=0.02$ )                         | 66% ( $n=1000$ , $y=9$ )                                     | This work |

### Supplementary References:

- 1 X. Wu, M. Sun, S. Guo, J. Qian, Y. Liu, Y. Cao, X. Ai and H. Yang, Vacancy-Free Prussian Blue Nanocrystals with High Capacity and Superior Cyclability for Aqueous Sodium-Ion Batteries, *ChemNanoMat*, 2015, **1**, 188–193.
- 2 X. Wu, C. Wu, C. Wei, L. Hu, J. Qian, Y. Cao, X. Ai, J. Wang and H. Yang, Highly Crystallized Na<sub>2</sub>CoFe(CN)<sub>6</sub> with Suppressed Lattice Defects as Superior Cathode Material for Sodium-Ion

Batteries, *ACS Appl. Mater. Interfaces*, 2016, **8**, 5393–5399.

3 Y. Liu, Y. Qiao, W. Zhang, Z. Li, X. Ji, L. Miao, L. Yuan, X. Hu and Y. Huang, Sodium storage in Na-rich  $\text{Na}_x\text{FeFe}(\text{CN})_6$  nanocubes, *Nano Energy*, 2015, **12**, 386–393.

4 R. Chen, Y. Huang, M. Xie, Z. Wang, Y. Ye, L. Li and F. Wu, Chemical Inhibition Method to Synthesize Highly Crystalline Prussian Blue Analogs for Sodium-Ion Battery Cathodes, *ACS Appl. Mater. Interfaces*, 2016, **8**, 31669–31676.

5 Q. Yang, F. Mo, Z. Liu, L. Ma, X. Li, D. Fang, S. Chen, S. Zhang and C. Zhi, Activating C-Coordinated Iron of Iron Hexacyanoferrate for Zn Hybrid-Ion Batteries with 10 000-Cycle Lifespan and Superior Rate Capability, *Advanced Materials*, 2019, **31**, 1901521.

6 Z. Liu, G. Pulletikurthi and F. Endres, A Prussian Blue/Zinc Secondary Battery with a Bio-Ionic Liquid–Water Mixture as Electrolyte, *ACS Appl. Mater. Interfaces*, 2016, **8**, 12158–12164.

7 G. Ni, Z. Hao, G. Y. Zou, F. H. Cao, L. Qin and C. G. Zhou, High-Performance Aqueous Rechargeable K/Zn Hybrid Batteries Based on Berlin Green Cathode Materials, *ChemElectroChem*, 2022, **9**, e202101351.
